# Supplementary material for: New insight on optical and magnetic Fe3O4 nanoclusters promising for near infrared theranostic applications
Source: Royal Society of Chemistry journal article supplement (doi:10.1039/c5nr03157e), 2015-01-01
Supplement: c5nr03157e1.pdf [file c5nr03157e1.pdf]

## Supporting Information

New insight on optical and magnetic Fe<sub>3</sub>O<sub>4</sub> nanoclusters  
promising for near infrared theranostic applications.

*Chih-Chia Huang*<sup>a,b,c\*</sup> *Po-Yang Chang*,<sup>a,b</sup> *Chien-Liang Liu*,<sup>a</sup> *Jia-Pu Xu*,<sup>b</sup> *Shu-Pao Wu*,<sup>d</sup> and

*Wen-Chuan Kuo*,<sup>b,c\*</sup>

<sup>a</sup> Department of Photonics, Center for Micro/Nano Science and Technology, and Advanced Optoelectronic Technology Center, National Cheng Kung University, 701, Tainan, Taiwan.

<sup>b</sup> Institute of Biophotonics, National Yang-Ming University, Taipei, 112, Taiwan.

<sup>c</sup> Biophotonics and Molecular Imaging Research Center (BMIRC), National Yang-Ming University, Taipei, 112, Taiwan

<sup>d</sup> Department of Applied Chemistry, National Chiao Tung University, Hsinchu, Taiwan.

Email: c2huang@mail.ncku.edu ; wckuo@ym.edu.tw

To study in vitro release, we incubated FITC-adsorbed  $\text{Fe}_3\text{O}_4$  CNPs ( $1000 \text{ ppm}_{[\text{Fe}]}$ ) in phosphate-buffered saline (PBS) buffer solution (1 mL) at different aging time. The loss of FITC was carefully collected and quantified to estimate the residual amount of FITC ( $0.75 \mu\text{M}$ ) within  $\text{Fe}_3\text{O}_4$  CNPs ( $1000 \text{ ppm}_{[\text{Fe}]}$ ). Although the interaction between FITC molecule and the surface of  $\text{Fe}_3\text{O}_4$  CNPs is followed with physical absorption, the FITC leakage after 14 days was negligible when compared to the loading FITC molecule at the same concentration. This result indicated that the release of FITC would be depleted for any interference in the confocal imaging of HeLa cells incubated with FITC-adsorbed  $\text{Fe}_3\text{O}_4$  CNPs (4h).

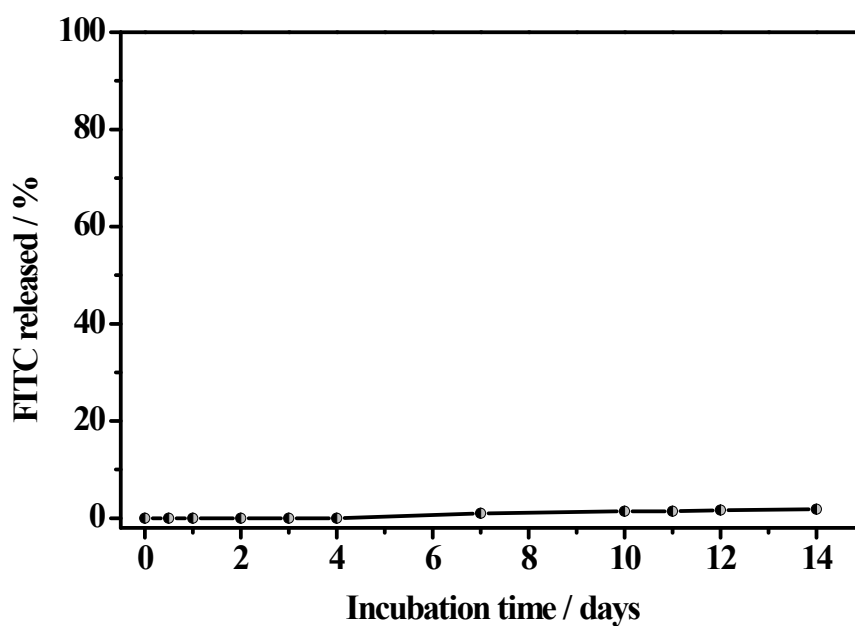

**Figure S1.** In vitro release profile of FITC molecule from FITC-adsorbed  $\text{Fe}_3\text{O}_4$  CNP solution at  $37^\circ\text{C}$

Figure S2 shows optical analyses of the as-obtained Fe<sub>3</sub>O<sub>4</sub> CNPs to identify the carboxylate molecules at the surface. The assignments were according to the literature.<sup>[1-4]</sup> Figure S2a shows a FT-IR spectrum. A band at 570 cm<sup>-1</sup> appeared, which is consistent with the Fe–O vibrations of the Fe<sub>3</sub>O<sub>4</sub> structure. The absorptions at 1558 and 1373 cm<sup>-1</sup> are assigned to the carboxylate groups of *vas*(COO)- and *vs*(COO)-, respectively. The peak labeled f at 1745 cm<sup>-1</sup> could be attributed to free –COOH. A surface analysis using X-ray photoelectron spectroscopy (XPS) (Figure S2b-d, Supporting Information) determined the Fe 2p oxidation state at 710.1 eV (2p<sub>3/2</sub>) and ~723.5 eV (2p<sub>1/2</sub>) matching the Fe<sup>2+/3+</sup> ions in the Fe<sub>3</sub>O<sub>4</sub> CNPs. The O 1s spectrum presented a band at approximately 539.5 eV, in agreement with the lattice O<sup>2-</sup> of the Fe<sub>3</sub>O<sub>4</sub>. The additional broadening of the band obtained at ~531.5 eV can be ascribed to the Fe-O complex at the surface and exposed COOH, C=O, and –OH groups from the binding TMA/citrate molecules. A signal at 284.3 eV was calibrated using the C1s photoelectron peak. Peaks at 286.4 eV and 289 eV are due to the organic ligand coating layer on the particle surface.

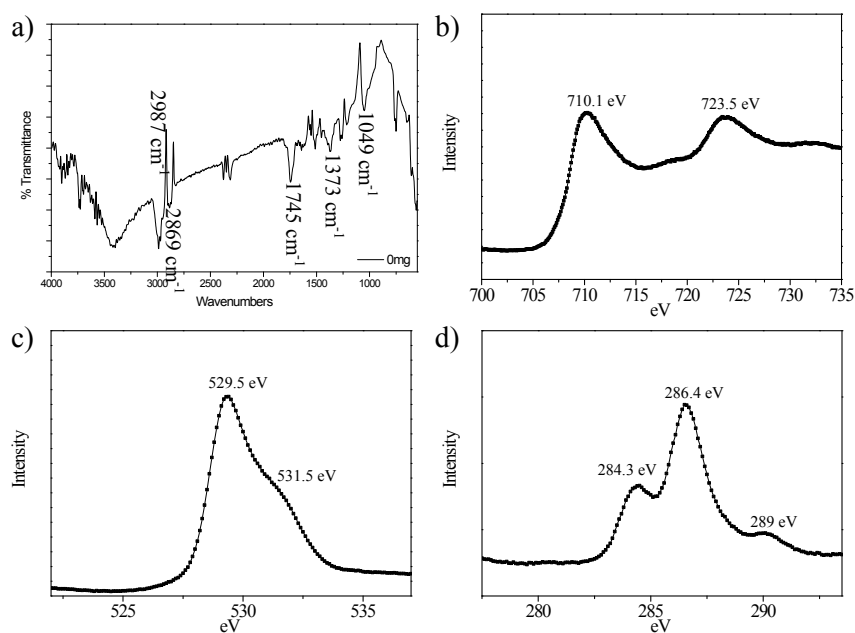

**Figure S2.** a) FT-IR measurement of as-prepared Fe<sub>3</sub>O<sub>4</sub> CNPs. High-resolution XPS core-level spectra of b) Fe 2p, c) O 1s, and d) C 1s for as-prepared Fe<sub>3</sub>O<sub>4</sub> CNPs.

- [1] A. G. Roca, J. F. Marco, M. d. P. Morales, C. J. Serna, *J. Phys. Chem. C* **2007**, *111*, 18577.  
 [2] M. Y. Liao, C. H. Wu, P. S. Lai, J. S. Yu, H. P. Lin, T. M. Liu, C. C. Huang, *Adv. Funct. Mater.* **2013**, *23*, 2044.  
 [3] M.-Y. Liao, P.-S. Lai, H.-P. Yu, H.-P. Lin, C.-C. Huang, *Chem. Commun.* **2012**, *48*, 5319.  
 [4] Y.-L. Huang, H.-W. Tien, C.-C. M. Ma, S.-Y. Yang, S.-Y. Wu, H.-Y. Liu, Y.-W. Mai, *J. Mater. Chem.* **2011**, *21*, 18236.

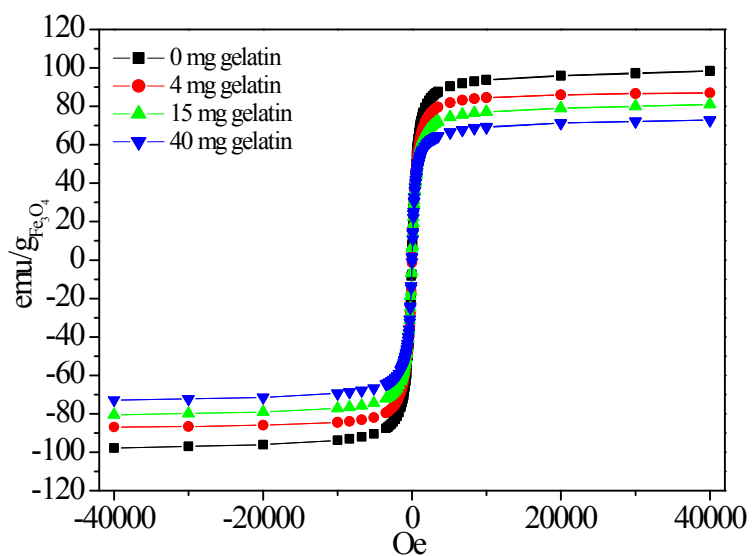

**FigureS3.** SQUID measurements of the M-H curves (300 K) for the as-prepared Fe<sub>3</sub>O<sub>4</sub> CNPs after the hydrothermal reactions (200 °C and 13 h) of FeCl<sub>2</sub>, citrate ions, TMA, and N<sub>2</sub>H<sub>4</sub> with different concentrations of gelatin molecules.

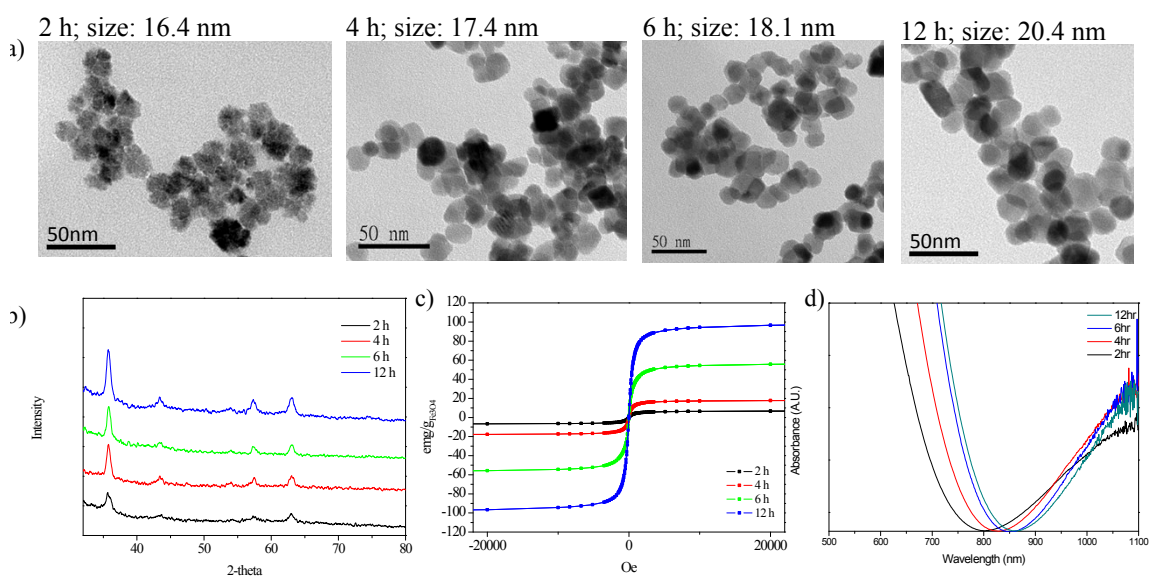

**Figure S4.** Time-dependent a) TEM images, b) XRD measurements, c) SQUID analysis and d) UV-visible-NIR spectra for monitoring the growth of Fe<sub>3</sub>O<sub>4</sub> CNPs.

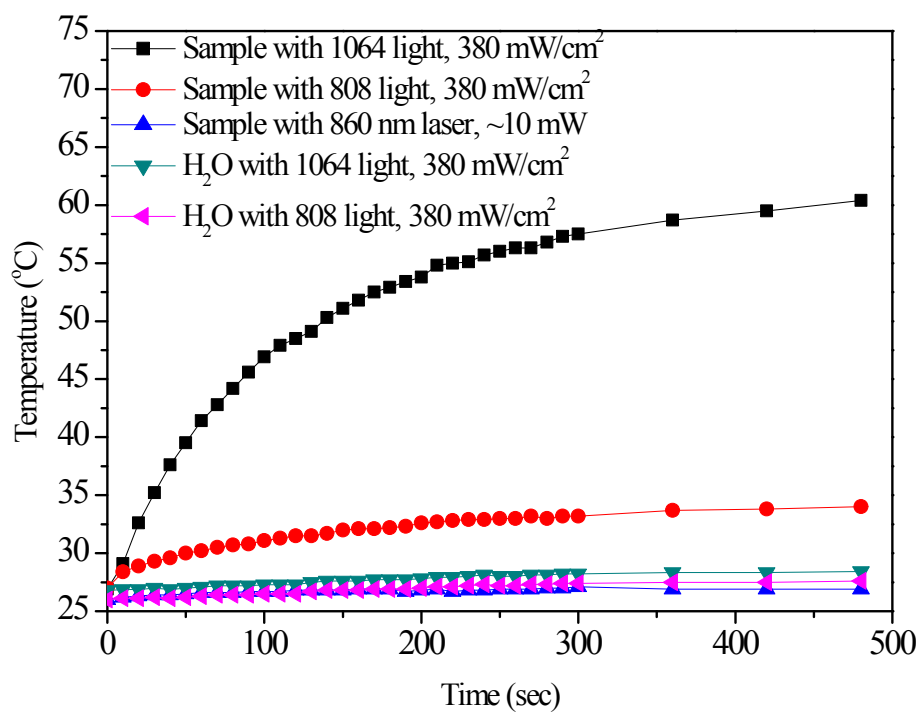

**Figure S5.** Temperature dependence of the aqueous Fe<sub>3</sub>O<sub>4</sub> CNP (375 ppm) solution as a function of laser (NIR-I 808 nm, NIR-I 860 nm (OCT light source), and NIR-II 1064 nm (photothermal light source)) irradiation time.

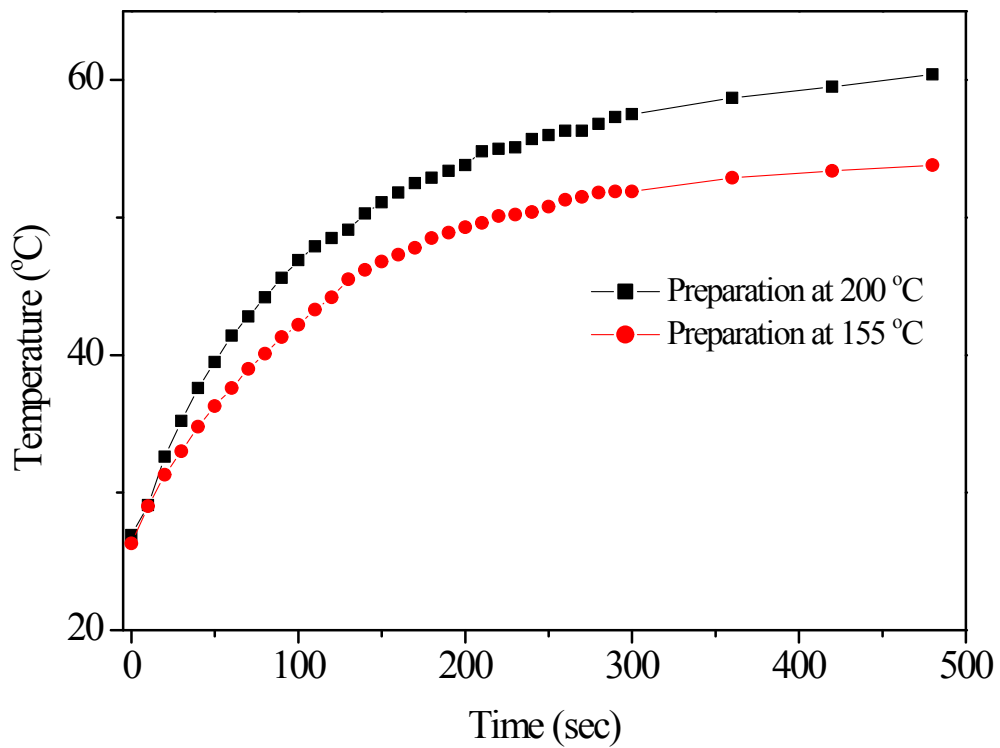

**Figure S6.** Temperature dependence of the aqueous  $\text{Fe}_3\text{O}_4$  CNP solution, prepared at 155 °C and 200 °C, as a function of NIR-II laser irradiation at 1064 nm.

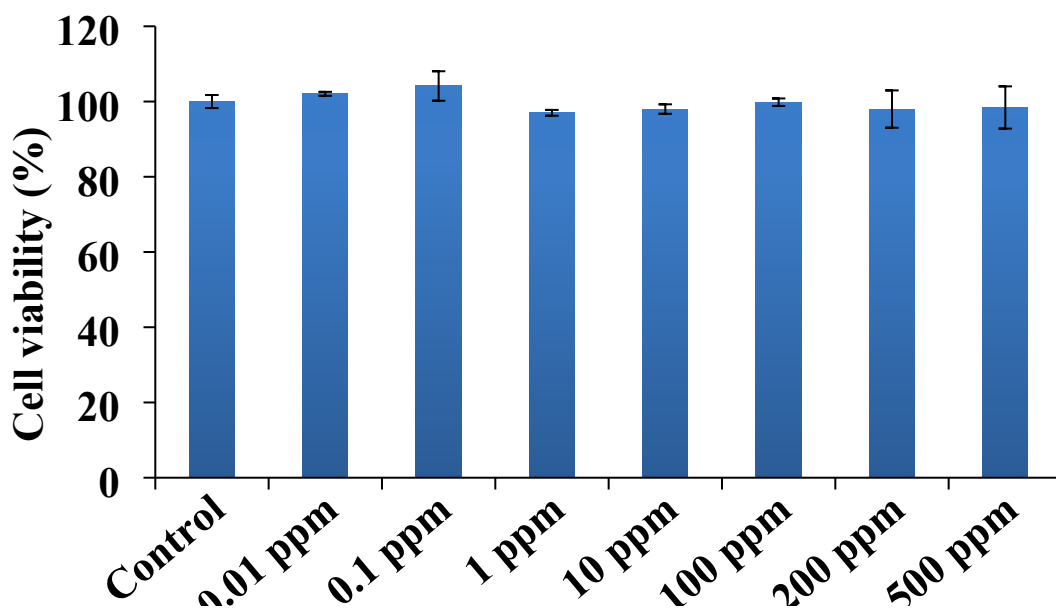

**Figure S7.** MTT assay of the HeLa cells incubated with Fe<sub>3</sub>O<sub>4</sub> CNPs after 24 h.



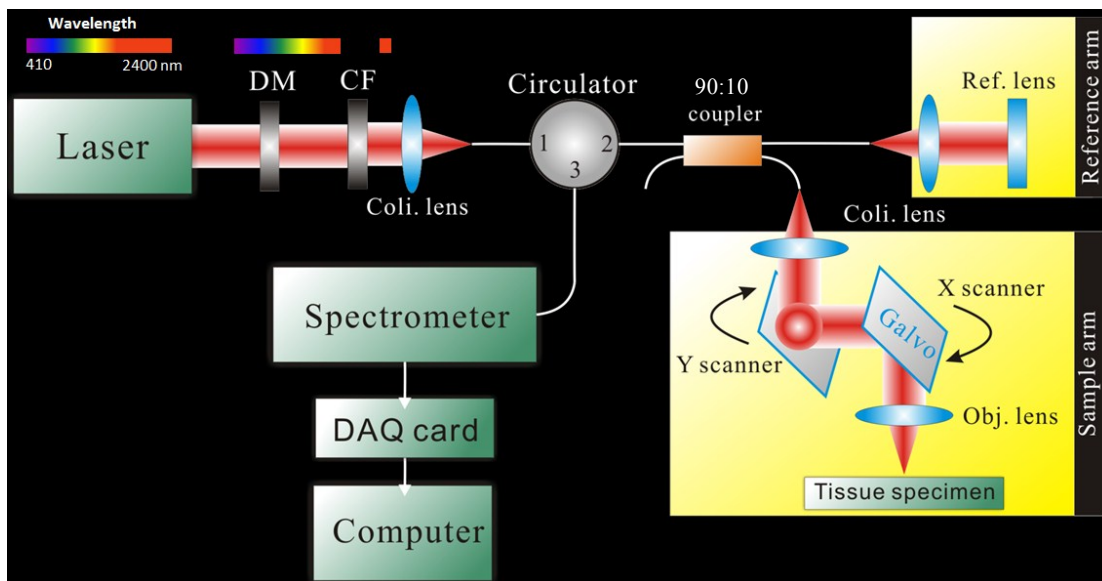

**Figure S8.** Schematic of the UHR-SDOCT system. Coli. lens: collimation lens, Ref. lens: reference lens mirror, DM: dichroic mirror, CF: color filter, Obj. lens: objective lens, Galvo: galvanometer scanner, DAQ: data acquisition card.

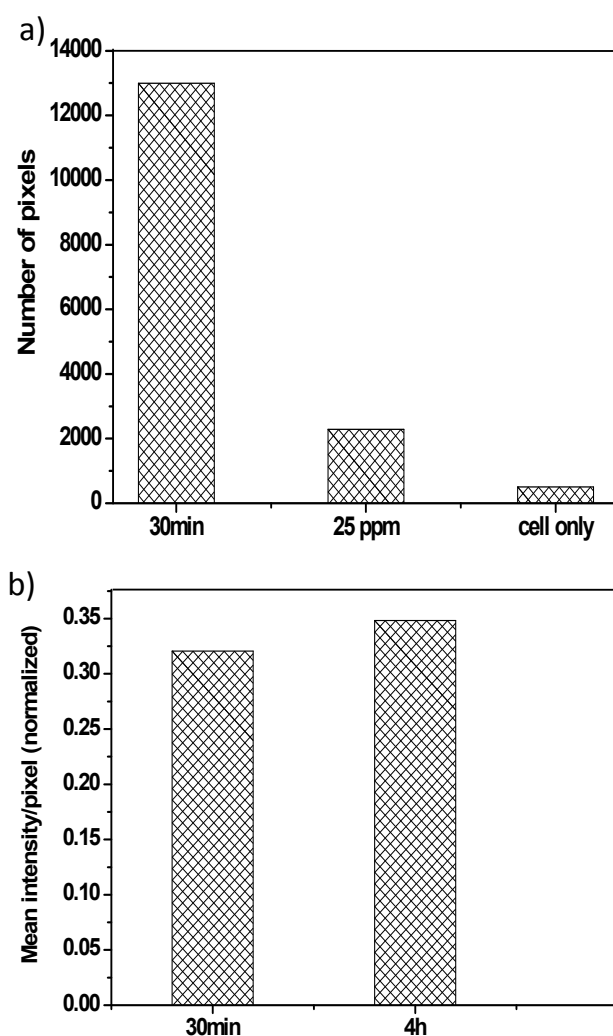

**Figure S9.** a) Quantitative analysis of the HeLa cells incubated without and with Fe<sub>3</sub>O<sub>4</sub> CNPs (150 ppm). b) Analysis of mean intensity per pixel from the HeLa cells ( $2.4 \times 10^5$ ) treated with Fe<sub>3</sub>O<sub>4</sub> CNPs (150 ppm) after 30 min and 4 h. The raw data showing the image signals are in Figure 4 and Figure 5 in the main text.

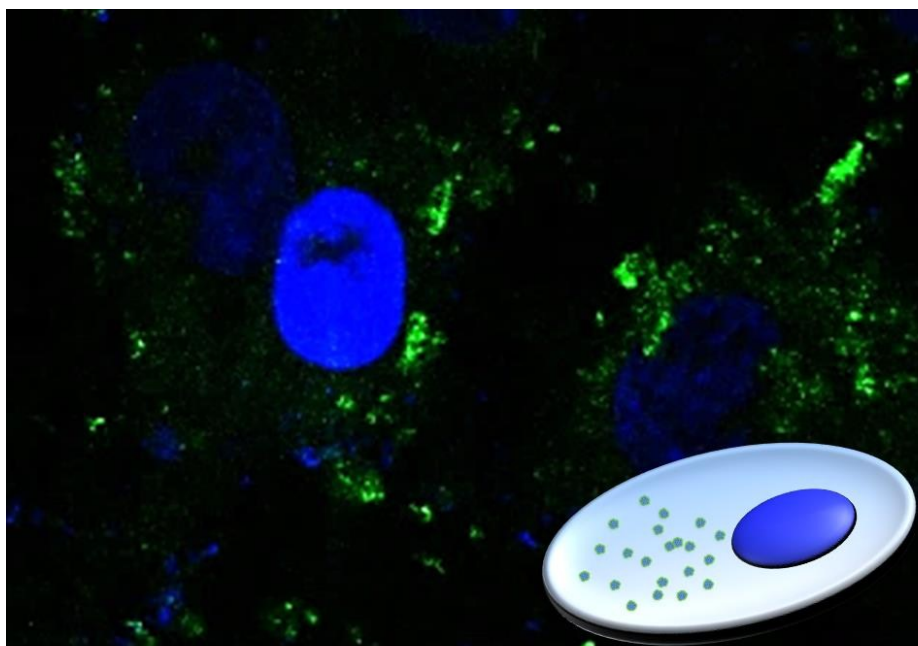

**Figure S10.** Confocal laser images of HeLa cells treated with FITC-adsorbed Fe<sub>3</sub>O<sub>4</sub> CNPs for 4 h. The blue color represents DAPI stained nuclei.

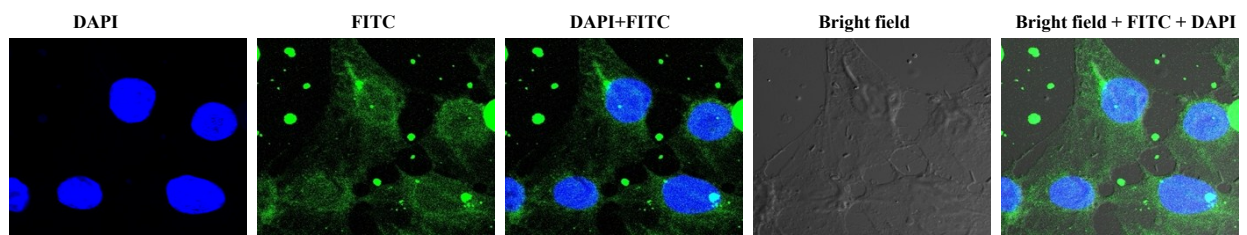

**Figure S11.** Confocal laser images of HeLa cells treated with FITC alone (green fluorescence) for 4 h. The blue color represents DAPI stained nuclei.

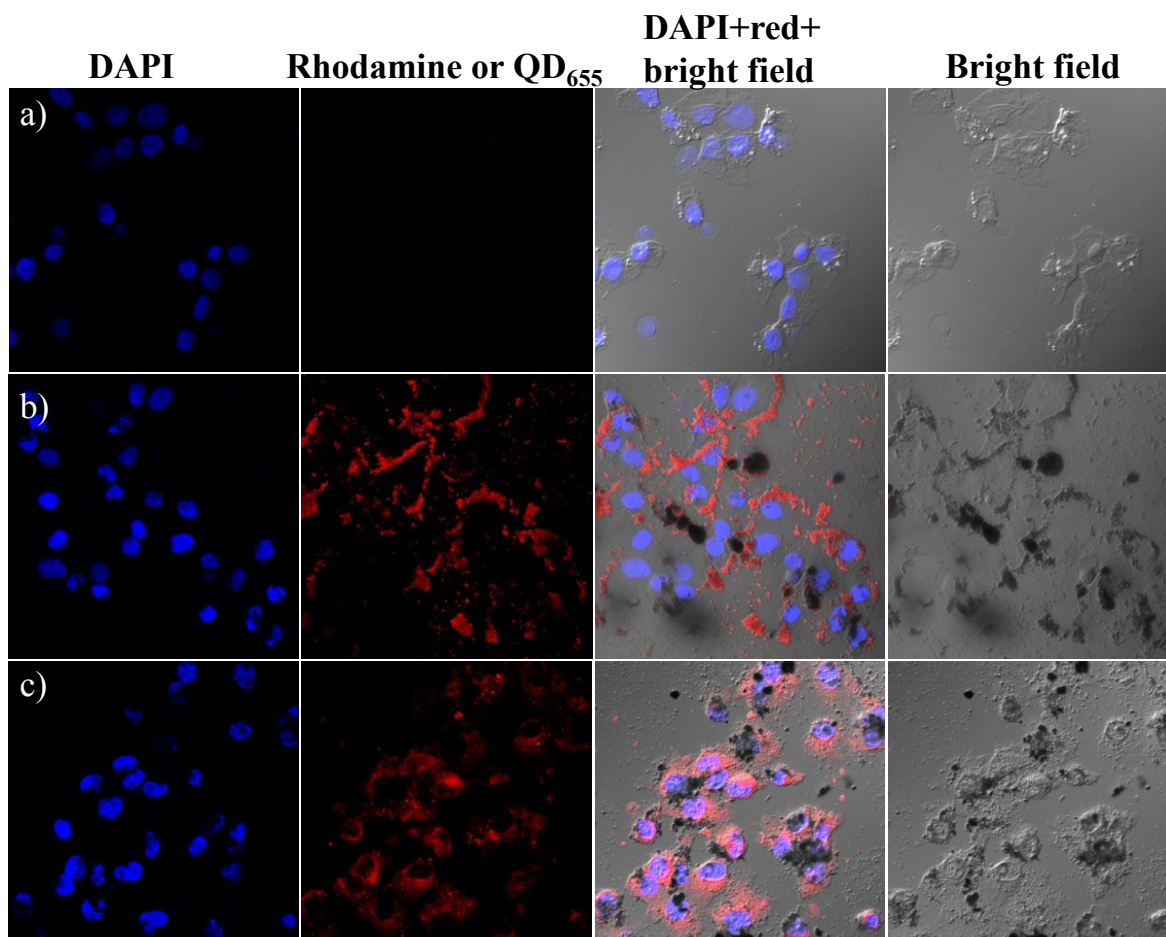

**Figure 12.** Confocal images of HeLa cells after different treatments: a) cell alone (4 h), b) QD<sub>655</sub>-conjugated Fe<sub>3</sub>O<sub>4</sub> CNPs (4h), and c) Fe<sub>3</sub>O<sub>4</sub> CNPs (4 h) + rhodamine-based chemosensor/HCl.

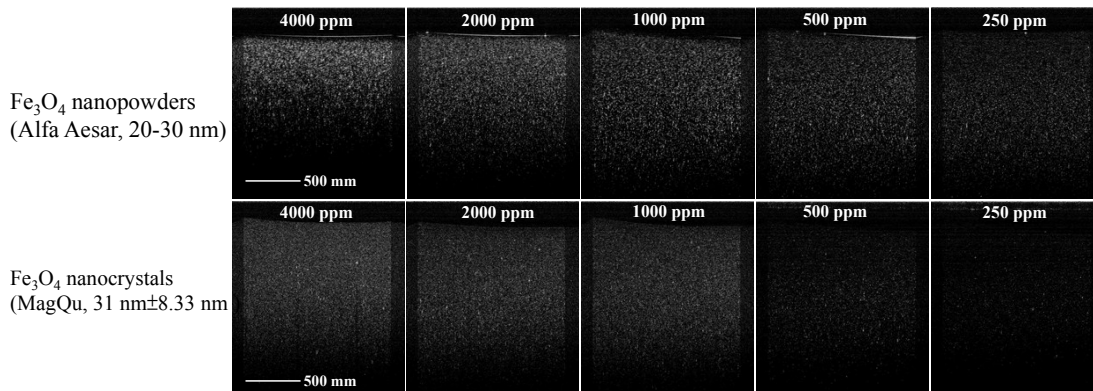

**Figure S13.** X–Z images from a chamber containing different concentrations of a-e)  $\text{Fe}_3\text{O}_4$  nanopowder (Alfa Aesar, 20-30 nm) and colloidal  $\text{Fe}_3\text{O}_4$  nanocrystals (MagQu, 31 nm  $\pm$  8.33 nm ) using an OCT microscope system with a laser light source with an 860 nm center wavelength.
